# Supplementary material for: Towards an RNA/Peptides World by the Direct RNA Template Mechanism: The Emergence of Membrane-Stabilizing Peptides in RNA-Based Protocells
Source: MDPI journal article supplement (doi:10.3390/life13020523), 2023-02-14
Supplement: s1 [file s1]

**Table S1. The values adopted in the parameter analysis (Figure S1 and S2)**

| Up-v3              | Up-v2              | Up-v1              | v0                        | Down-v1            | Down-v2            | Down-v3            |
|--------------------|--------------------|--------------------|---------------------------|--------------------|--------------------|--------------------|
| 0.99               | 0.98               | 0.95               | $P_{PJM}=0.9$             | 0.5                | 0.2                | 0.1                |
| 0.9                | 0.5                | 0.2                | $P_{PLM}=0.1$             | 0.05               | 0.02               | 0.01               |
| 0.9                | 0.5                | 0.2                | $P_{AAF}=0.1$             | 0.05               | 0.02               | 0.01               |
| 0.95               | 0.9                | 0.5                | $P_{AAD}=0.2$             | 0.1                | 0.05               | 0.02               |
| 0.95               | 0.9                | 0.5                | $P_{PLR}=0.2$             | 0.1                | 0.05               | 0.02               |
| 0.1                | 0.05               | 0.02               | $P_{PBB}=0.01$            | 0.005              | 0.002              | 0.001              |
| 0.2                | 0.1                | 0.05               | $P_{NF}=0.02$             | 0.01               | 0.005              | 0.002              |
| 0.5                | 0.2                | 0.1                | $P_{ND}=0.05$             | 0.02               | 0.01               | 0.005              |
| 0.01               | 0.005              | 0.002              | $P_{NDE}=0.001$           | $5 \times 10^{-4}$ | $2 \times 10^{-4}$ | $1 \times 10^{-4}$ |
| $1 \times 10^{-4}$ | $5 \times 10^{-5}$ | $2 \times 10^{-5}$ | $P_{BB}=1 \times 10^{-5}$ | $5 \times 10^{-6}$ | $2 \times 10^{-6}$ | $1 \times 10^{-6}$ |
| 0.001              | $5 \times 10^{-4}$ | $2 \times 10^{-4}$ | $P_{FP}=1 \times 10^{-4}$ | $5 \times 10^{-5}$ | $2 \times 10^{-5}$ | $1 \times 10^{-5}$ |
| 0.98               | 0.95               | 0.9                | $P_{SP}=0.5$              | 0.2                | 0.1                | 0.05               |
| 0.99               | 0.98               | 0.95               | $P_{AT}=0.9$              | 0.5                | 0.2                | 0.1                |
| 0.98               | 0.95               | 0.9                | $P_{TL}=0.5$              | 0.2                | 0.1                | 0.05               |
| $1 \times 10^{-5}$ | $5 \times 10^{-6}$ | $2 \times 10^{-6}$ | $P_{RL}=1 \times 10^{-6}$ | $5 \times 10^{-7}$ | $2 \times 10^{-7}$ | $1 \times 10^{-7}$ |
| 0.95               | 0.9                | 0.5                | $P_{AJM}=0.2$             | 0.1                | 0.05               | 0.02               |
| 0.01               | 0.005              | 0.002              | $P_{ALM}=0.001$           | $5 \times 10^{-4}$ | $2 \times 10^{-4}$ | $1 \times 10^{-4}$ |
| 0.2                | 0.1                | 0.05               | $P_{AF}=0.02$             | 0.01               | 0.005              | 0.002              |
| 0.1                | 0.05               | 0.02               | $P_{AD}=0.01$             | 0.005              | 0.002              | 0.001              |
| 0.9                | 0.5                | 0.2                | $F_{DW}=0.1$              | 0.05               | 0.02               | 0.01               |
| 0.99               | 0.98               | 0.95               | $P_{APP}=0.9$             | 0.5                | 0.2                | 0.1                |
| 0.98               | 0.95               | 0.9                | $P_{NPP}=0.5$             | 0.2                | 0.1                | 0.05               |
| 0.99               | 0.98               | 0.95               | $P_{AAPF}=0.9$            | 0.5                | 0.2                | 0.1                |
| 0.99               | 0.98               | 0.95               | $P_{MV}=0.9$              | 0.5                | 0.2                | 0.1                |
| 200                | 100                | 50                 | $F_{DO}=20$               | 10                 | 5                  | 2                  |
| 0.01               | 0.005              | 0.002              | $P_{CF}=0.001$            | $5 \times 10^{-4}$ | $2 \times 10^{-4}$ | $1 \times 10^{-4}$ |
| 0.5                | 0.2                | 0.1                | $P_{CD}=0.05$             | 0.02               | 0.01               | 0.005              |
| $2 \times 10^{-3}$ | $1 \times 10^{-3}$ | $5 \times 10^{-4}$ | $P_{CB}=2 \times 10^{-4}$ | $1 \times 10^{-4}$ | $5 \times 10^{-5}$ | $2 \times 10^{-5}$ |
| 0.9                | 0.5                | 0.2                | $P_{MC}=0.1$              | 0.05               | 0.02               | 0.01               |
| 0.9                | 0.5                | 0.2                | $P_{MF}=0.1$              | 0.05               | 0.02               | 0.01               |

Note: The upper portion of the probabilities (above the dashed line) is for Figure S1 and the lower portion is for Figure S2. “v0” means the default value; “Up-v1”, “Up-v2” and “Up-v3” means the values adopted at the three turning steps (one after another; see red arrows in the figures) for the case of parameter-turning-up; “Down-v1”, “Down-v2” and “Down-v3” means the values adopted at the three turning steps for the case of parameter-turning-down.
